# Supplementary material
Source: publisher figshare collection journal article supplement (https://karger.figshare.com/ndownloader/files/28969596)
Supplement: Supplementary file 1 [file 28969596]

**Supplemental Material Table B: Correlations of different burdens perceived during the pandemic. Kendall-Tau correlations. ***P*<.01**

| **Burdens perceived during the pandemic** | 1 | 2 | 3 | 4 | 5 | 6 | 7 | 8 | 9 | 10 | 11 | 12 | 13 |
| --- | --- | --- | --- | --- | --- | --- | --- | --- | --- | --- | --- | --- | --- |
| 1 I have no relevant burdens |  |  |  |  |  |  |  |  |  |  |  |  |  |
| 2 I have had a corona virus infection | -.025 |  |  |  |  |  |  |  |  |  |  |  |  |
| 3 A closely related person had a corona virus infection | -.024 | .167** |  |  |  |  |  |  |  |  |  |  |  |
| 4 A closely related person died in consequence of a corona virus infection | -.004 | -.012 | .142** |  |  |  |  |  |  |  |  |  |  |
| 5 I have lost my workplace | -.076** | .010 | -.020 | .001 |  |  |  |  |  |  |  |  |  |
| 6 A closely related person has lost her/his workplace | -.091** | .031 | .034* | .008 | .134** |  |  |  |  |  |  |  |  |
| 7 Due to the pandemic protection means I have financial losses which impact on my daily life | -.191* | .004 | -.046** | -.025 | .241** | .172** |  |  |  |  |  |  |  |
| 8 I have experienced violence while living near together in my household | -.023 | .009 | .020 | .032 | .089** | .092** | .028 |  |  |  |  |  |  |
| 9 I feel overload due to living near together in my household | -.163** | .028 | .011 | .022 | .012 | .092** | .067** | .161** |  |  |  |  |  |
| 10 I perceive a loss of social contacts | -.372** | .001 | -.003 | .007 | .048** | .085** | .151** | .034** | .129** |  |  |  |  |
| 11 I am suffering from the loss of social contacts | -.377** | .000 | -.009 | -.016 | .064** | .090** | .119** | .045** | .165** | .307** |  |  |  |
| 12 I have problems with selfcare and self management due to the pandemic security means (visiting authorities, going shopping) | -.102** | .008 | -.006 | -.020 | .072** | .074** | .074** | .111** | .088** | .107** | .134** |  |  |
| 13 I experienced cancelling of (medical) therapies due to the pandemic security means | -.198** | .018 | .007 | -.009 | .053** | .151** | .081** | .093** | .114** | .197** | .231** | .213** |  |
| 14 I do not have the necessary technique to use online communication channels such as WhattsApp, Skype or other | -.047** | .004 | -.021 | -.013 | .058** | .031 | .053** | .068** | .013 | .057** | .063** | .095** | .067** |

*Note:* Multiple answers were possible. Some persons who reported any burden (e.g. loss of social contacts) may nevertheless say that they perceived no relevant burdens (items 1). This may occur in case a person perceived the given event (e.g. loss of social contacts), but did not find this of great burdening impact for him/herself.
